# Supplementary material
Source: PubMed Central journal article supplement (PMC1413501)
Supplement: NIHMS7768-supplement-Supp.pdf [file NIHMS7768-supplement-Supp.pdf]

**Table 3. Complete List of genes regulated by Nex1**

| Description                                        | Accession Number | Fold regulation |
|----------------------------------------------------|------------------|-----------------|
| <b>Cytoskeletal Genes</b>                          |                  |                 |
| MAP-1A                                             | M83196           | 2               |
| MAP-2                                              | X54100           | 2               |
| Tau                                                | X79321           | 2               |
| NF-M                                               | Z12152           | 3.3             |
| NF-H                                               | M21964           | 2               |
| Kinesin-related prorein (KIF-1D)                   | AJ000696         | 2               |
| Cytoplasmic dynein intermediate chain 2C           | U39046           | 2.2             |
| Cytokeratin 8                                      | M63482           | 2.2             |
| Cytocentrin                                        | U82623           | 2.6             |
| Bithoraxoid-like protein                           | AF073839         | 2               |
| Tropomyosin beta subunit                           | AA012678         | 2               |
| <b>Cell Adhesion Encoding Genes</b>                |                  |                 |
| Brevican                                           | X79881           | 4.8             |
| Ryudocan                                           | M81786           | 2               |
| S-laminin                                          | X16563           | 2               |
| Laminin receptor                                   | M27798           | 2.1             |
| Thy-1                                              | X03150           | -4.9            |
| TAG-1                                              | M31725           | -6.3            |
| Neurologin-1                                       | U22952           | -4              |
| Neural cell adhesion molecule L1                   | X59149           | -3              |
| <b>Vesicular Trafficking/Synapse Related Genes</b> |                  |                 |
| SynGAP-b1                                          | AF058789         | 2               |
| Synaptotagmin VII                                  | U20106           | 2.1             |
| Synaptogyrin 1                                     | U39549           | 2               |
| Complexin I                                        | U35098           | 2               |
| Sortilin                                           | AF019109         | 2.5             |
| SAPAP2                                             | U67138           | 18              |
| Synaptogyrin 2                                     | AF039085         | -2              |
| Rabphilin 3A                                       | U12571           | -10             |
| Synaptotagmin VI                                   | U20105           | -3              |
| Complexin II                                       | U35099           | -2              |
| Synaptonemal complex lateral element protein 2     | Y08981           | 2               |
| Synaptonemal complex lateral element protein 3     | X65454           | 3.7             |
| Synaptic membrane glycoprotein gp55                | X99337           | 2               |
| EF-hand calcium binding protein p22                | U39875           | 2               |
| Lin-10 protein homolog                             | U92010           | 2               |
| Cript                                              | AF047384         | 2               |
| n-chimaerin                                        | X67250           | 2               |
| Rabin 3                                            | U19181           | 2               |
| Rab28                                              | X78606           | 2.5             |
| B/K protein                                        | U30831           | 2.0             |
| SC65 synaptonemal complex protein                  | X65454           | 2.1             |
| Vesicle-associated membrane protein 1B             | U74621           | -2.2            |
| SNAP-25 interacting protein HRS-2m                 | U7863            | -2.3            |
| GTPase Rab8b                                       | U53475           | -2.8            |
| Vacuolar adenosine triphosphate subunit B          | Y12635           | -3              |
| GFI2 protein                                       | L36459           | -2              |
| Chromogranin B                                     | AF019974         | -2              |
| <b>Metabolic Related Genes</b>                     |                  |                 |
| Beta-glucuronidase                                 | M13962           | 3.5             |
| Fumerase                                           | J04473           | 3.3             |
| Creatine kinase                                    | M14864           | 2               |
| GM3 synthase                                       | AB018049         | 2.5             |
| Carnitine octanoyltransferase                      | U26033           | 2               |

|                                                            |          |      |
|------------------------------------------------------------|----------|------|
| Arginosuccinate synthase                                   | M36708   | 7    |
| Ornithine transcarbamylase                                 | M11266   | 2.4  |
| Ornithine aminotransferase                                 | M11842   | 5.2  |
| Ornithine decarboxylase                                    | X07944   | 2    |
| Guanyl cyclase                                             | M57507   | 2.3  |
| Glutamate dehydrogenase                                    | X14223   | 2.2  |
| Beta-4N-acetylgalactosaminyltransferase                    | D17809   | 3.9  |
| Stearyl-CoA desaturase 2                                   | U67995   | 3.3  |
| Mevalonate kinase                                          | M29472   | 2    |
| Beta-alanine pyruvate aminotransferase                     | AB002584 | 2    |
| Guanosine monophosphate reductase                          | AF090867 | 2.3  |
| 5-oxo-L-prolinase                                          | U70825   | 3    |
| GTP cyclohydrolase 1                                       | M58364   | 2.5  |
| Carboxypeptidase                                           | J00713   | 2    |
| Betaine homocystein methyltransferase                      | AF038870 | 3.1  |
| Branched-chain alpha ketoacid dehydrogenase kinase         | M93271   | 3.3  |
| Sarcosine dehydrogenase                                    | AF067650 | 2    |
| Uroporphyrinogen decarboxylase                             | Y00350   | 2.1  |
| Isovaleryl-CoA dehydrogenase                               | J05031   | 2    |
| Peroxisomal multifunctional enzyme type 2                  | U37486   | 2    |
| Mitochondrial enoyl-CoA hydratase precursor                | X15958   | 2    |
| Oxidative 17-beta hydroxysteroid dehydrogenase type 6      | U89280   | 2.5  |
| Heme-oxygenase 3                                           | AF058787 | 2    |
| Hydroxyindole-o-methyltransferase                          | L78306   | 2.7  |
| Acyl-CoA synthase 5                                        | AB012933 | -2   |
| Cytochrome c oxidase subunit VIa                           | X12553   | -2   |
| Epoxide hydrolase                                          | M26125   | -2.3 |
| ABC transporter                                            | AJ003004 | -2   |
| Proton pump polypeptide                                    | M58758   | -2   |
| N-acetylglucosaminyltransferase I                          | D16802   | -2.2 |
| PHAS-1 protein                                             | U05014   | -2.1 |
| Apolipoprotein B                                           | M21842   | -5   |
| <b>Stress Response Related Genes</b>                       |          |      |
| Lens aldolase reductase                                    | M60322   | 2    |
| Stress-inducible chaperone Grpe                            | U62940   | 2    |
| Glutathione S-transferase M3                               | J02744   | -2.2 |
| <b>Mitochondrial Genes</b>                                 |          |      |
| Delta subunit of F1F0 ATPase                               | U00926   | 2.2  |
| Mitochondrial processing protease p52                      | D13907   | 2.0  |
| <b>RNA Processing</b>                                      |          |      |
| RNA splicing related protein YT521                         | D78303   | 3.5  |
| RNA helicase 117                                           | U25746   | 2    |
| <b>Kinases and Phosphatases</b>                            |          |      |
| Calcium/calmodulin-dependent protein kinase 1 beta         | D86556   | 2    |
| Serine/threonine phosphatase alpha 1 catalytic subunit     | D90163   | 4    |
| Serine/threonine phosphatase beta 1 catalytic subunit      | D90164   | 2    |
| Serine/threonine phosphatases gamma catalytic subunit      | D90165   | 2    |
| <b>Receptors</b>                                           |          |      |
| Glutamate receptor KA2 subunit                             | U08258   | -2   |
| JAG1                                                       | L38483   | -3.3 |
| VTR-15-20 receptor (G-protein)                             | AF053362 | -3   |
| <b>Transcription Factors &amp; Chromatin-Related Genes</b> |          |      |
| Mash-1                                                     | X53527   | 2.3  |
| HNF-3gamma                                                 | L09648   | 3.3  |
| Arix                                                       | U25967   | 2    |
| Retinoblastoma binding protein                             | L07126   | 2    |
| Cart-1                                                     | L14018   | 2    |
| RNA polymerase II polypeptide gene                         | Z71925   | 2.3  |

|                                           |          |      |
|-------------------------------------------|----------|------|
| RNA polymerase I 127 kDa subunit          | AF025424 | 3    |
| Nuclear receptor binding factor 1         | AB015724 | 2    |
| Small nuclear RING finger protein         | AF022081 | 2    |
| NAC1                                      | AF015911 | 2    |
| Histone 1T                                | M28409   | -6   |
| Death effector domain containing protein  | AF053362 | 2    |
| <b>Others</b>                             |          |      |
| Regeneration associated serpin precursor  | U55765   | 3.7  |
| Calpain like protease                     | AF067793 | 2    |
| Emerin                                    | X98377   | 2.1  |
| Nucleoporin 107 kDa                       | L31840   | 2    |
| Nucleoporin 84 kDa                        | U93692   | 2    |
| Pore membrane complex protein 121 kDa     | Z21513   | 2.2  |
| Phosphatidylethanolamine binding protein  | X75253   | 2    |
| Nucleopore glycoprotein 62                | J04143   | 2.4  |
| Protein kinase C binding protein Enigma   | U48247   | 3.2  |
| Pituitary LL5                             | X74226   | 2    |
| Thyroglobulin                             | M35965   | 2    |
| TSH-regulated gene                        | X68101   | 2.3  |
| Stanniocalcin                             | U62667   | -2.3 |
| Preprohypocretin                          | AF019565 | -3   |
| S100 related protein 42C                  | J03627   | -2.8 |
| S100-related protein 42A                  | J03628   | -2.1 |
| Major prion protein precursor             | D50093   | -2   |
| Vacuolar adenosine triphosphate subunit B | Y12635   | -3   |
| Cortixin                                  | L15011   | -2   |

Genes significantly modulated by Nex1 (P values  $\leq 0.05$ ) were grouped into functional categories based on information from GeneBank.
